# Supplementary material
Source: PubMed Central journal article supplement (PMC4497852)
Supplement: NIHMS690107-supplement-1.pdf [file NIHMS690107-supplement-1.pdf]

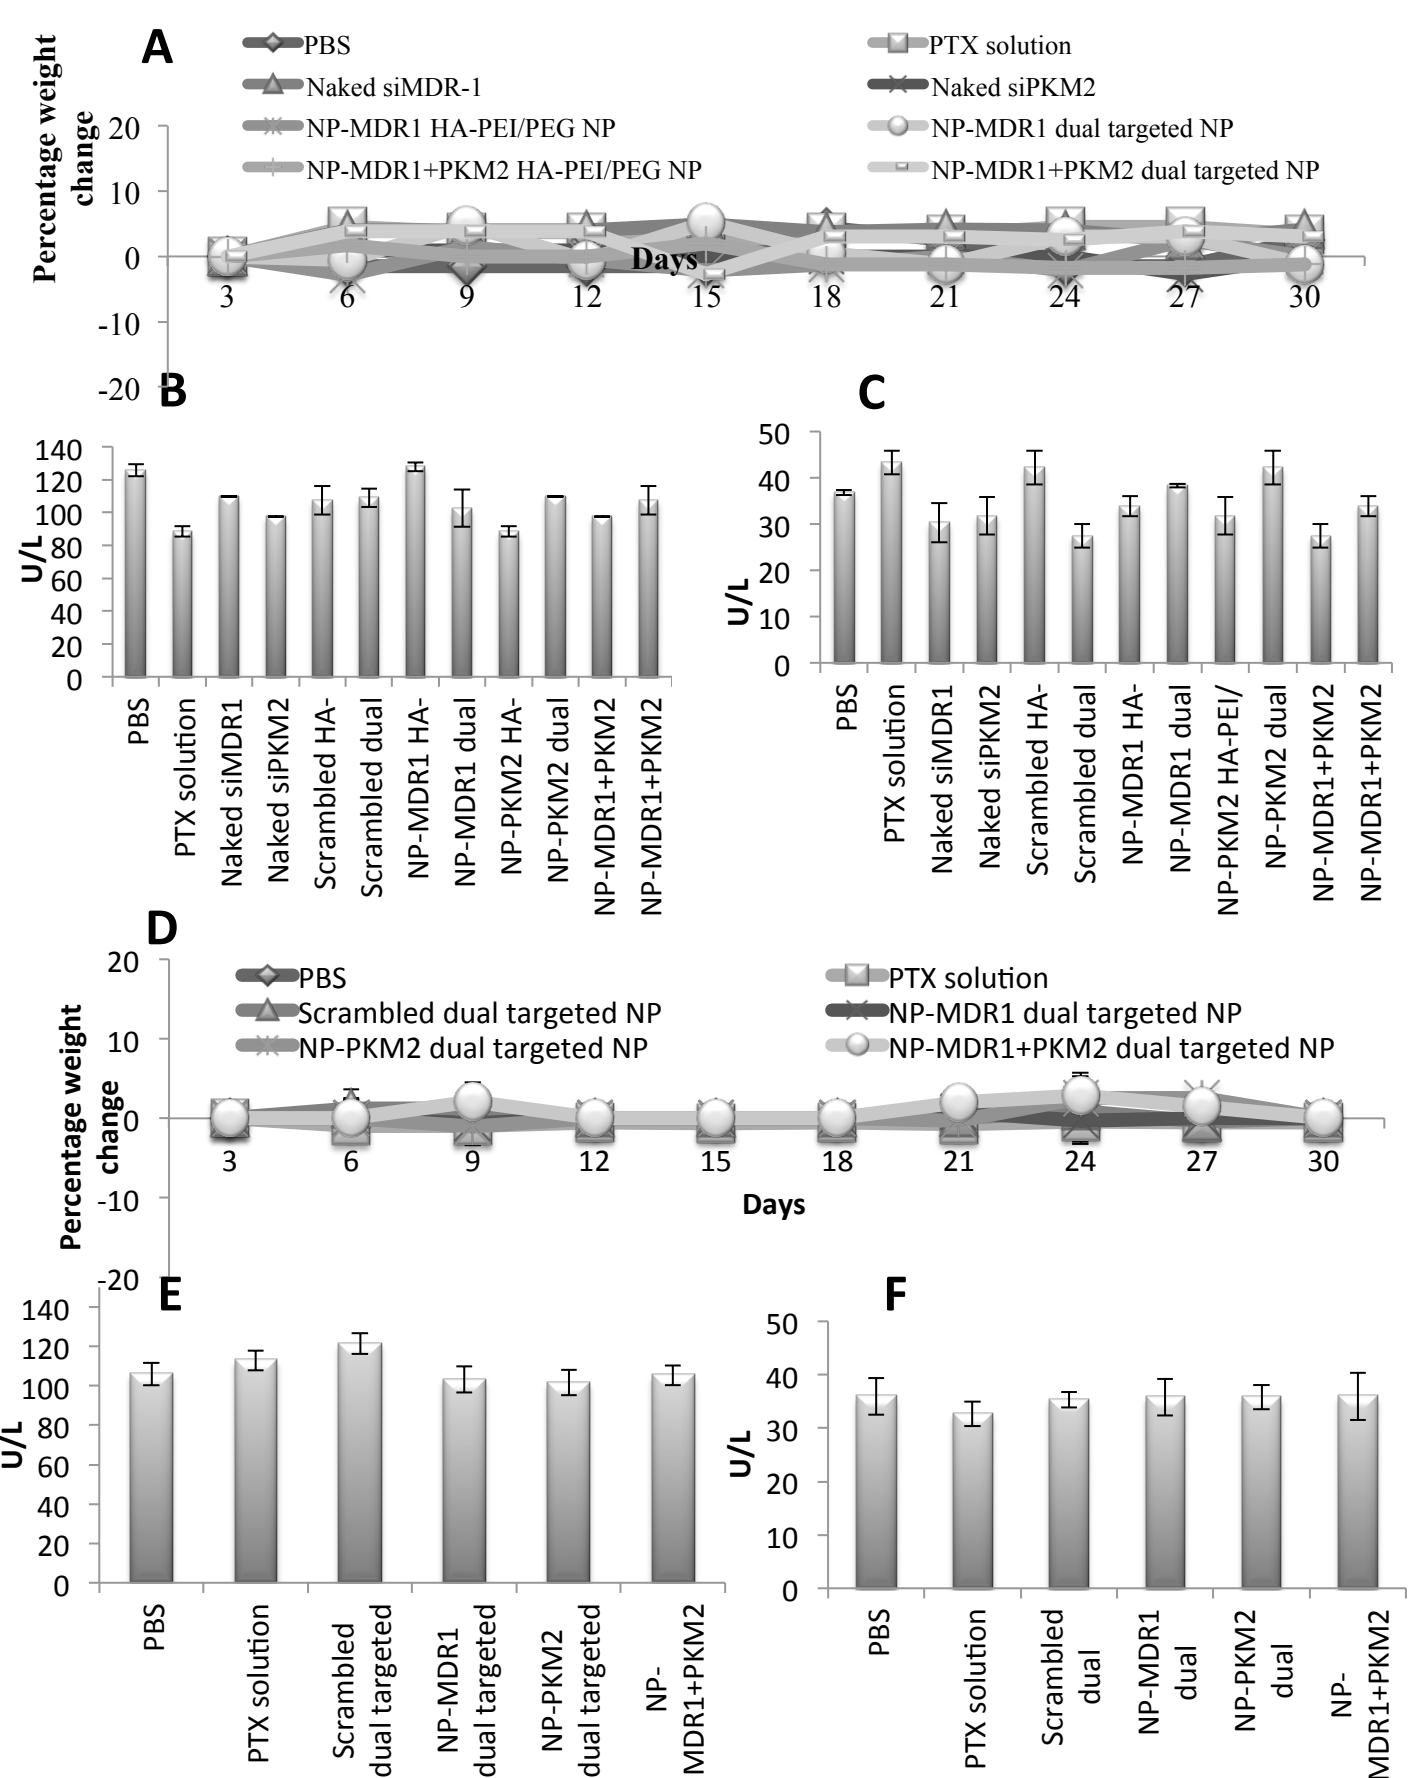

Figure 1: Safety analysis in SKOV-3WT tumor bearing mice that had single and combination treatments of siRNA and PTX. (A) Body weight changes, (B) ALT levels, (C) AST levels. Safety analysis in SKOV-3<sub>TR</sub> tumor bearing mice that had single and combination treatments of siRNA and PTX. (D) Body weight changes, (E) ALT levels, (F) AST levels.

## Liver

PBS

PTX solution

Naked  
siMDR1

Naked  
siPKM2

Scrambled HA-  
PEI/PEG NP

Scrambled  
dual targeted  
NP

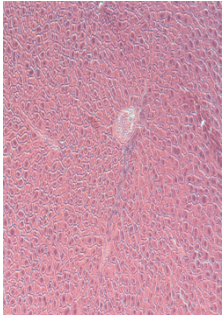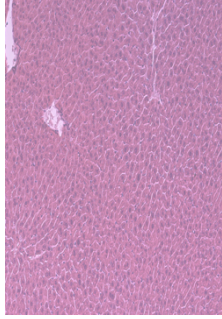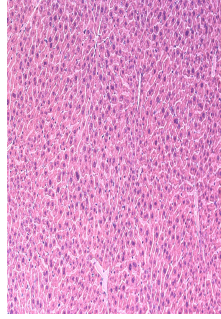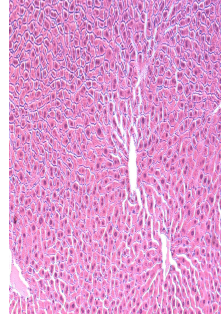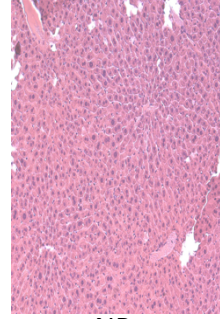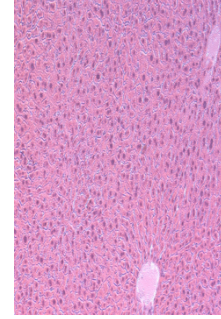

NP-MDR1  
HA-PEI/PEG  
NP

NP-MDR1  
dual targeted  
NP

NP-PKM2 HA-  
PEI/PEG NP

NP-PKM2  
dual targeted  
NP

NP-  
MDR1+PKM2  
HA-PEI/PEG NP

NP-MDR1+PKM2  
dual targeted NP

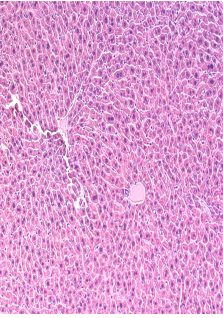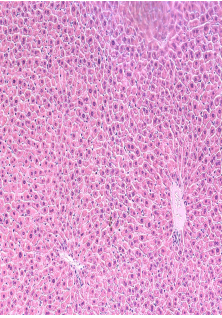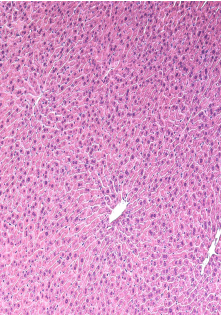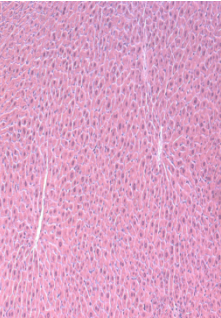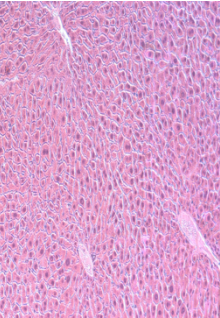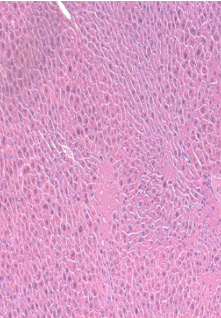

## Kidney

PBS

PTX solution

Naked  
siMDR1

Naked  
siPKM2

Scrambled HA-  
PEI/PEG NP

Scrambled  
dual targeted  
NP

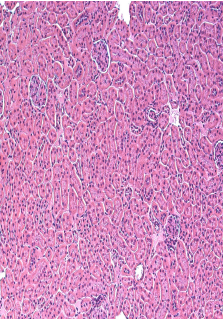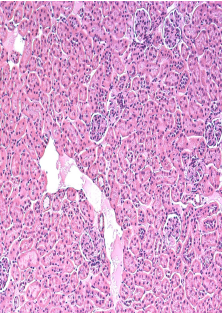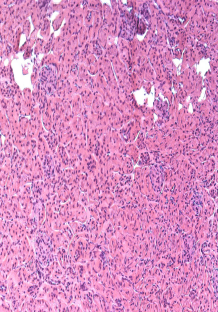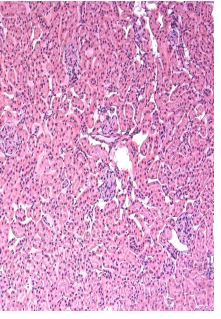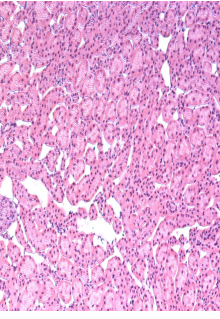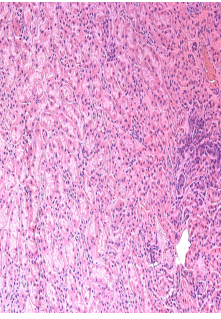

NP-MDR1  
HA-PEI/PEG  
NP

NP-MDR1  
dual targeted  
NP

NP-PKM2 HA-  
PEI/PEG NP

NP-PKM2  
dual targeted  
NP

NP-  
MDR1+PKM2  
HA-PEI/PEG NP

NP-MDR1+PKM2  
dual targeted NP

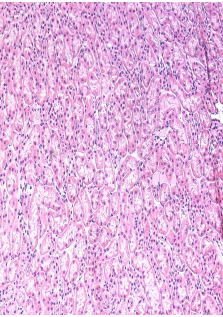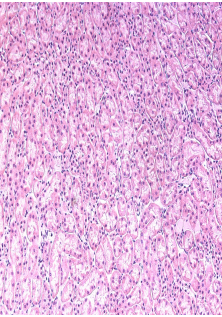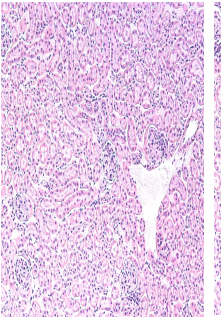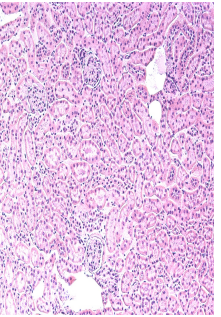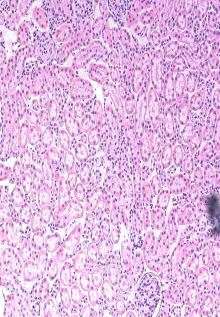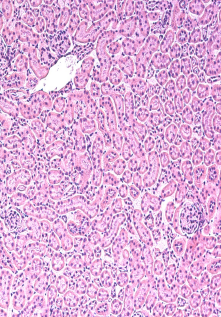

# Spleen

PBS

PTX solution

Naked  
siMDR1

Naked  
siPKM2

Scrambled HA-  
PEI/PEG NP

Scrambled  
dual targeted  
NP

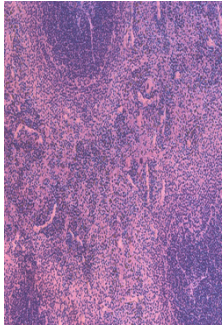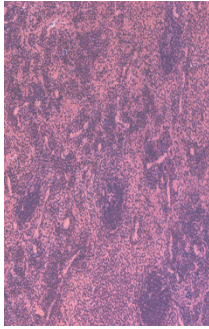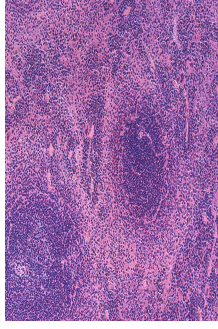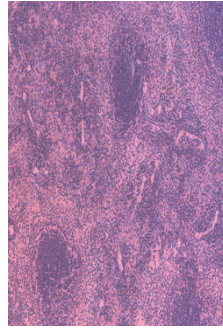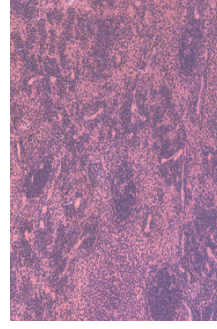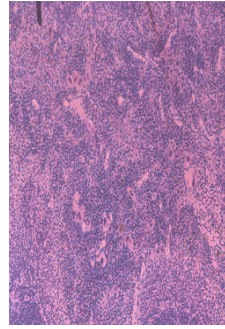

NP-MDR1  
HA-PEI/PEG  
NP

NP-MDR1  
dual targeted  
NP

NP-PKM2 HA-  
PEI/PEG NP

NP-PKM2  
dual targeted  
NP

NP-  
MDR1+PKM2  
HA-PEI/PEG NP

NP-MDR1+PKM2  
dual targeted NP

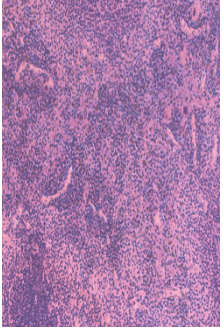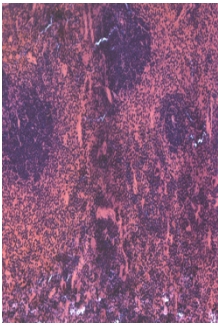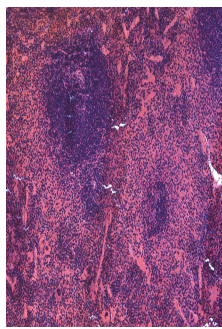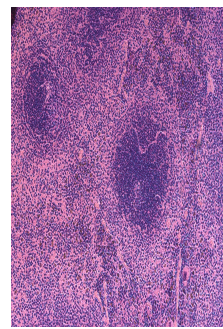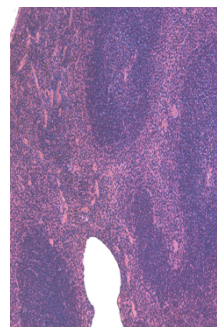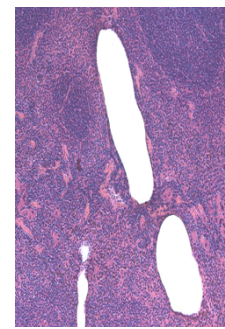

## Liver

PBS

PTX solution

Scrambled dual  
targeted NP

NP-MDR1  
dual targeted  
NP

NP-PKM2  
dual targeted  
NP

NP-MDR1+PKM2  
dual targeted NP

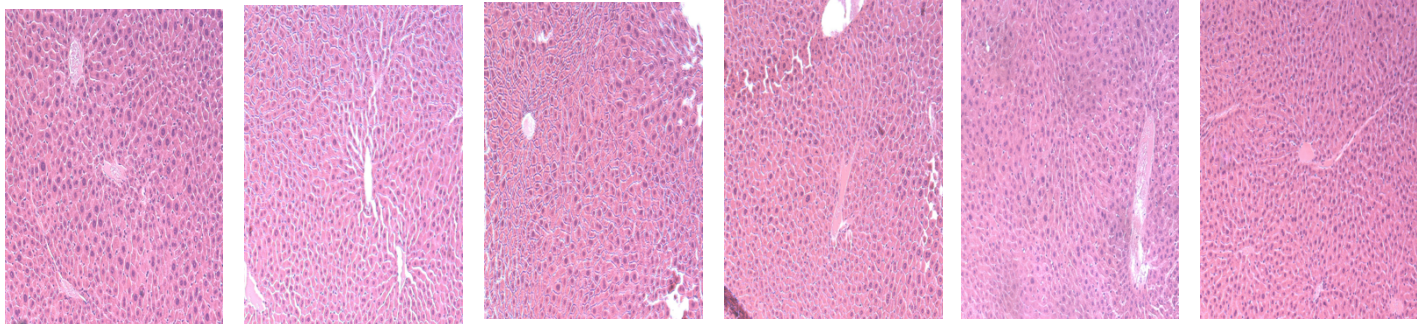

## Kidney

PBS

PTX solution

Scrambled dual  
targeted NP

NP-MDR1  
dual targeted  
NP

NP-PKM2  
dual targeted  
NP

NP-MDR1+PKM2  
dual targeted NP

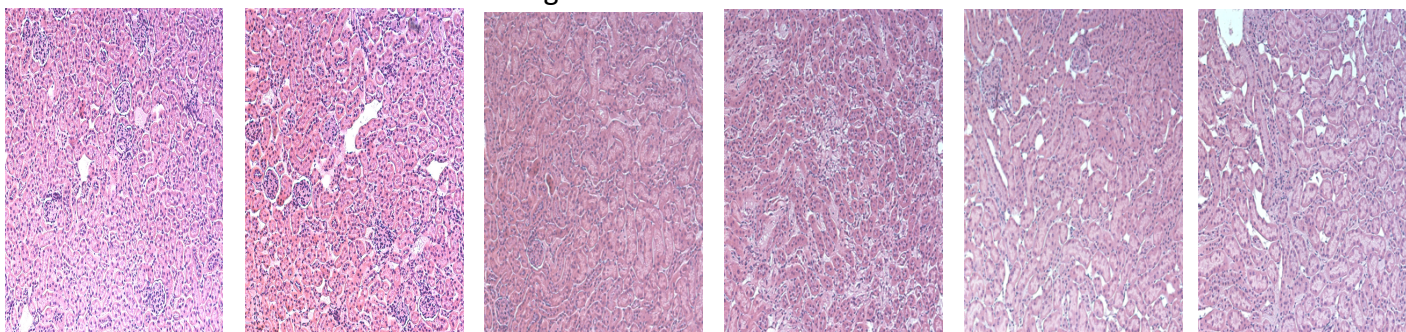

## Spleen

PBS

PTX solution

Scrambled dual  
targeted NP

NP-MDR1  
dual targeted  
NP

NP-PKM2  
dual targeted  
NP

NP-MDR1+PKM2  
dual targeted NP

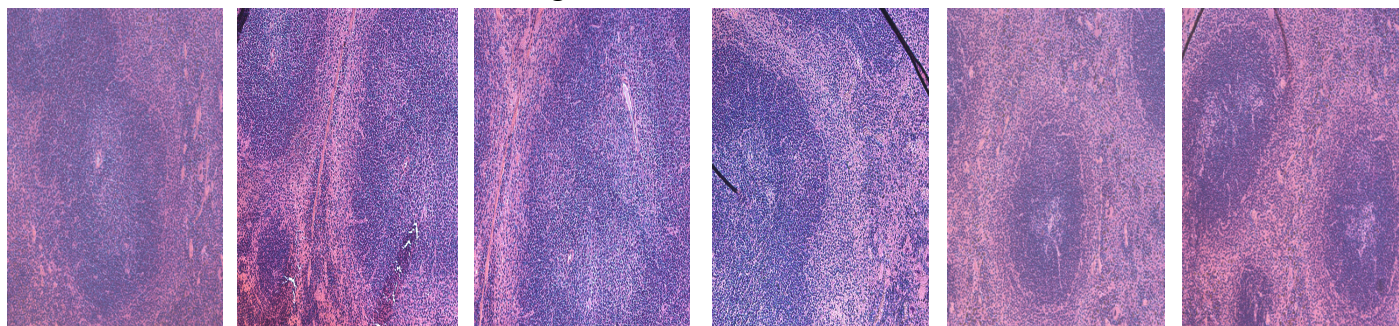

**Figure 2:** H&E staining for SKOV-3<sub>WT</sub> tumor bearing mice that had single and combination treatments of siRNA and PTX (A) Liver tissue, (B) Kidney and (C) Spleen. H&E staining for SKOV-3<sub>TR</sub> tumor bearing mice that had single and combination treatments of siRNA and PTX (A) Liver tissue, (B) Kidney and (C) Spleen.

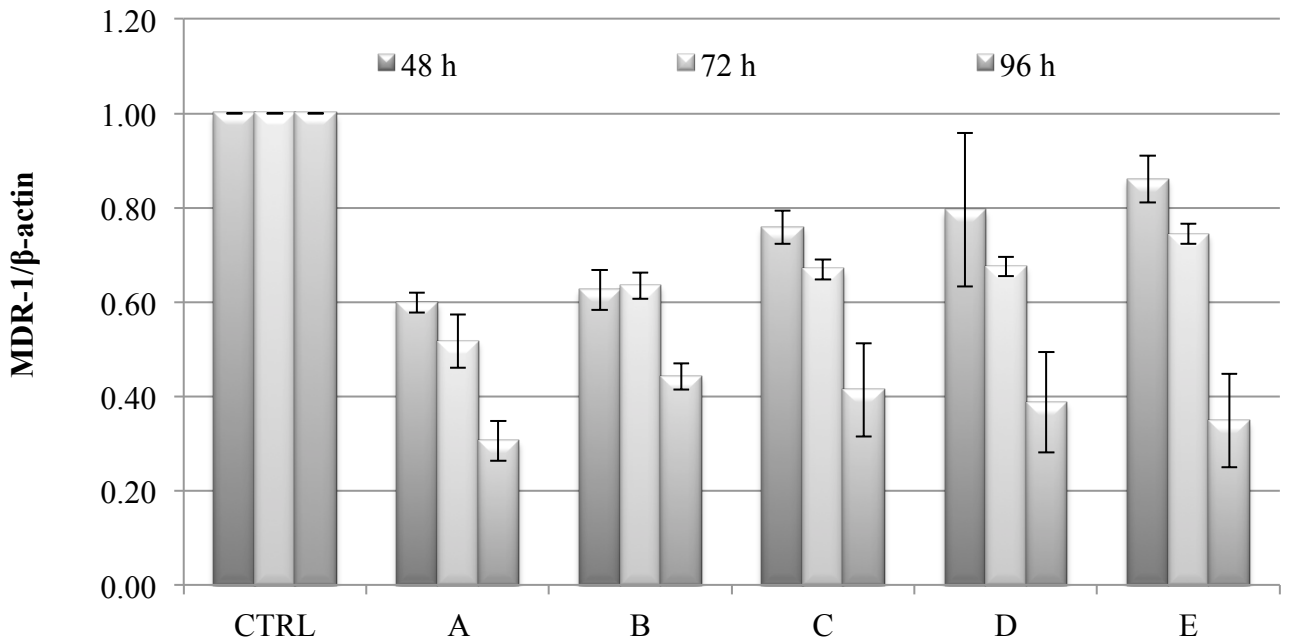

**Figure 3:** Alteration in HA-PEI/PEG:EGF ratio on siMDR-1 transfection efficiency. The three components (HA-PEI:PEG:EGF) were combined in the following ratio: A: 30:10:50, B: 30:20:40, C: 30:30:30, D:30:40:20, E: 30:50:10
